# Supplementary material
Source: PubMed Central journal article supplement (PMC2903911)

**Supplemental Figure 1:** HEC1A (A) NMuMG ( B ) cells were treated with 0.1% (v/v) DMSO or rosiglitazone (100 $\mu$ M ) for 1 hr. Subsequently, cells were processed for chromatin immunoprecipitation assays using either the PPAR $\gamma$  antibody or IgG control as described in Materials and Methods. Vehicle, .1% (v/v) DMSO; R, 100  $\mu$ M rosiglitazone.

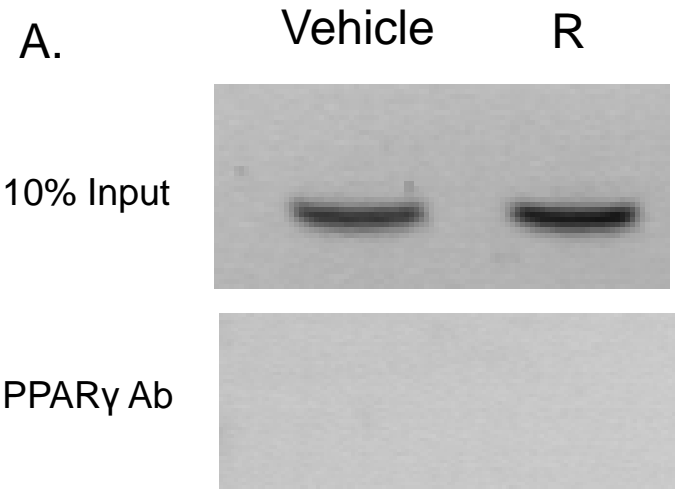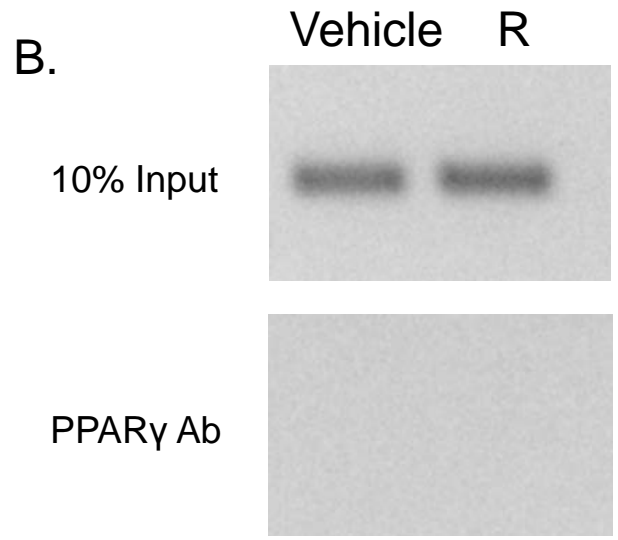

Supplement: me.2009-0221_1.pdf [file me.2009-0221_1.pdf]
